# Supplementary figures and images for: Sensory Neuron-Specific Deletion of Tropomyosin Receptor Kinase A (TrkA) in Mice Abolishes Osteoarthritis (OA) Pain via NGF/TrkA Intervention of Peripheral Sensitization
Source: MDPI journal article supplement (doi:10.3390/ijms232012076), 2022-10-11

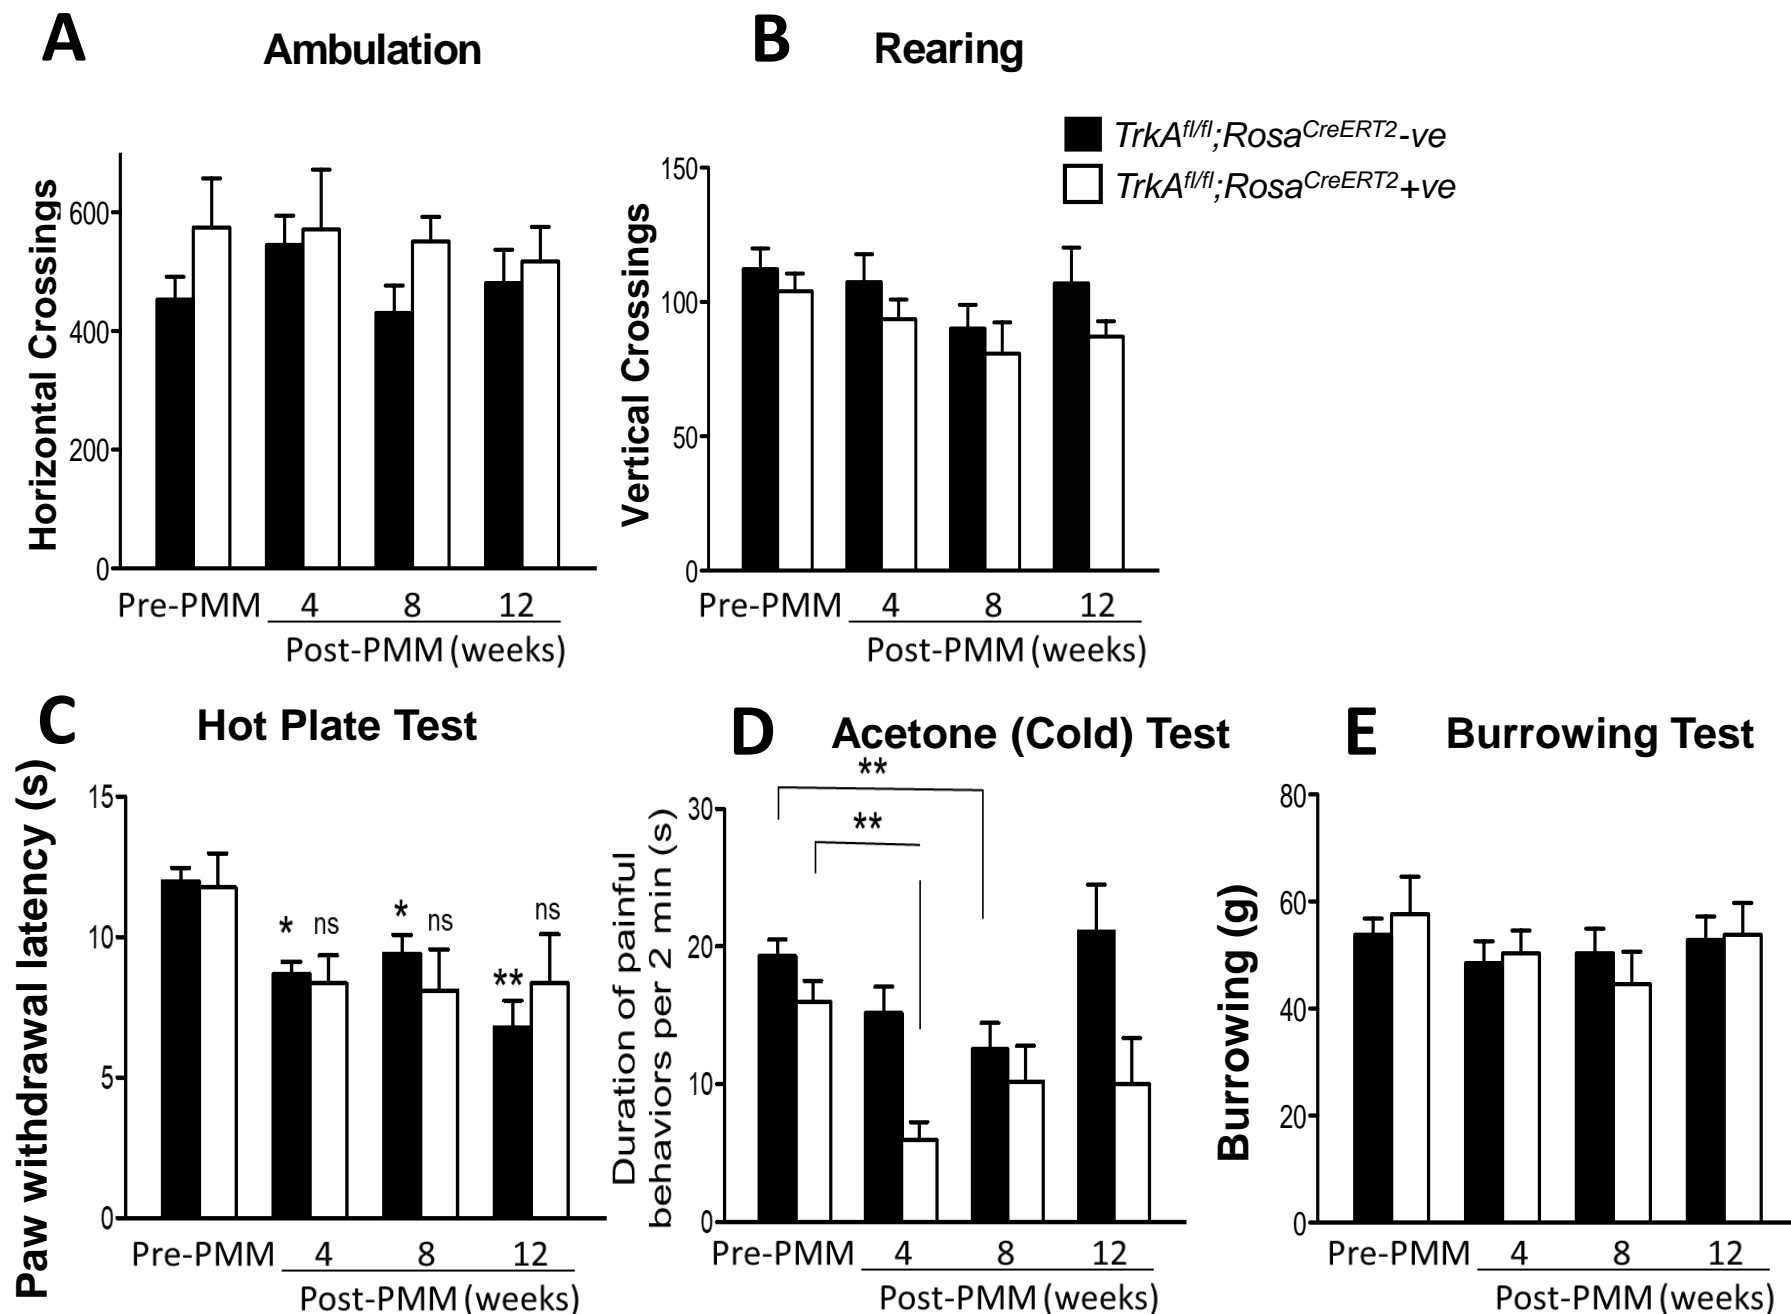

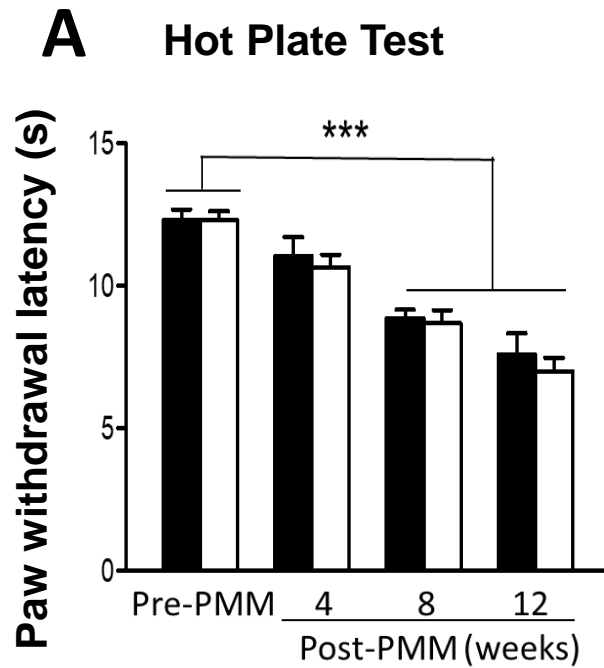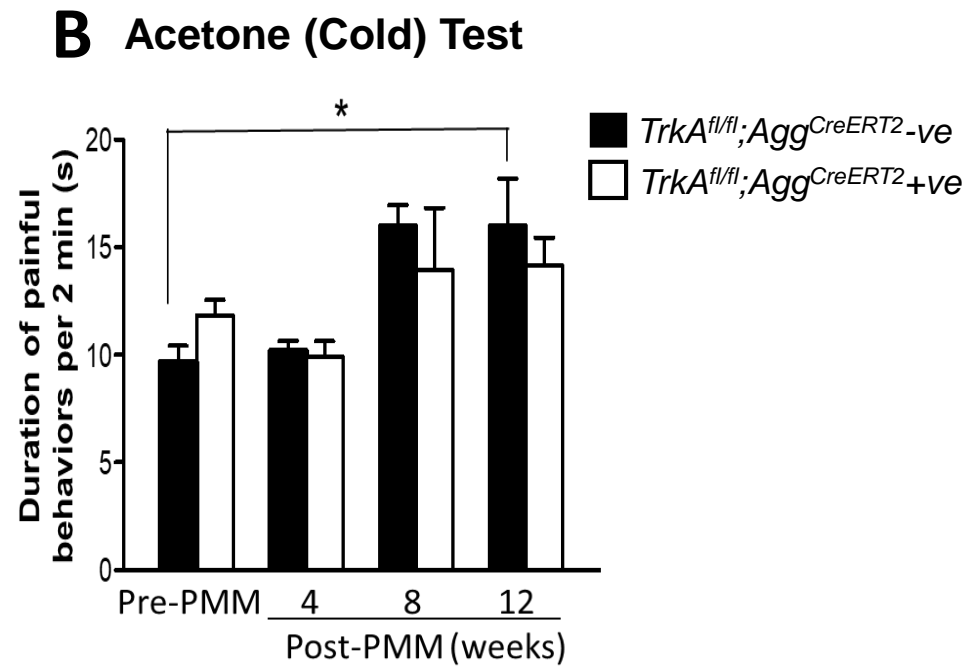

Supplement: s1 [file s1]
